# Supplementary material
Source: bioRxiv or medRxiv preprint supplement (https://www.biorxiv.org/highwire/filestream/115769/field_highwire_adjunct_files/1/381525-2.pdf)
Supplement: Supplementary file [file 381525-2.pdf]

**SUPPLEMENTAL TABLE 2**

|            |          |                                                                     | Summary Difference |              |           |           | TMP vs. Vh   |           |           |              | Dox/TMP vs. Vh |           |                                |           |      |       |
|------------|----------|---------------------------------------------------------------------|--------------------|--------------|-----------|-----------|--------------|-----------|-----------|--------------|----------------|-----------|--------------------------------|-----------|------|-------|
|            |          |                                                                     | Dox vs. Vh         |              | p-value   |           | TMP vs. Vh   |           | p-value   |              | Dox/TMP vs. Vh |           | p-value                        |           |      |       |
| ALLC_HUMAN | Average  | St. Dev.                                                            | q-value            | Stor Average | St. Dev.  | q-value   | Stor Average | St. Dev.  | q-value   | Stor Average | St. Dev.       | q-value   | Stor prioritized FI Secretary? |           |      |       |
| P13667     | PDI4A    | Protein disulfide-isomerase A4 OS                                   | -0.036583          | 0.2312397    | 0.6901033 | 0.2300344 | 1.1729845    | 0.2177922 | 7.47E-06  | 0.0003486    | 0.7876477      | 0.241629  | 0.0073319                      | 0.116089  | TRUE | TRUE  |
| P14625     | HSP90B1  | Endoplasmic reticulum OS                                            | -0.320475          | 0.2601488    | 0.0172645 | 0.0175842 | 1.0746761    | 0.2981099 | 7.581E-05 | 0.0017689    | 0.4284759      | 0.1933722 | 0.02135                        | 0.0845103 | TRUE | TRUE  |
| P11021     | HSPA5    | 78 kDa glucose-regulated protein OS                                 | -0.357474          | 0.2646001    | 0.0117219 | 0.01535   | 1.351948     | 0.4356388 | 0.0001761 | 0.002739     | 0.9261142      | 0.3741535 | 0.0158181                      | 0.1001812 | TRUE | TRUE  |
| Q9Y4L1     | HYOU1    | Hypoxia up-regulated protein 1 OS                                   | -0.099746          | 0.2523979    | 0.336036  | 0.1257278 | 0.8593252    | 0.2969419 | 0.0002593 | 0.0032056    | 0.6620047      | 0.2383886 | 0.0115122                      | 0.0911379 | TRUE | TRUE  |
| Q9UBS4     | DNAJB11  | Dnaj homolog subfamily B member 11 OS                               | -0.251335          | 0.2546744    | 0.0400637 | 0.0262322 | 0.677796     | 0.2631247 | 0.0004894 | 0.0045678    | 0.4641012      | 0.3001376 | 0.053605                       | 0.1543174 | TRUE | TRUE  |
| P27797     | CALR     | Calreticulin OS                                                     | -0.550777          | 0.2325057    | 0.0007663 | 0.0028099 | 0.5125014    | 0.3499378 | 0.0082197 | 0.063931     | -0.068928      | 0.3000627 | 0.6771748                      | 0.579564  | TRUE | TRUE  |
| Q14257     | RCN2     | Reticulocalbin-2 OS                                                 | -0.426971          | 0.224564     | 0.0131422 | 0.0160627 | 0.3621158    | 0.3653084 | 0.090963  | 0.2653099    | -0.024111      | 0.6925975 | 0.9686831                      | 0.6668471 | TRUE | TRUE  |
| Q07955     | SRSF1    | Serine/arginine-rich splicing factor 1 OS                           | 0.0723938          | 0.318354     | 0.6015291 | 0.2042228 | 0.2792407    | 0.3446242 | 0.1039434 | 0.2694828    | 0.0483091      | 0.1237426 | 0.4919668                      | 0.5024446 | TRUE | FALSE |
| P07237     | PAHB     | Protein disulfide-isomerase OS                                      | -0.331388          | 0.3104067    | 0.0301716 | 0.0221258 | 0.2782163    | 0.3224652 | 0.0625675 | 0.2246013    | 0.1946408      | 0.2695867 | 0.2444659                      | 0.386639  | TRUE | TRUE  |
| Q02809     | PLD1     | Phosphatidylcholine-specific phospholipase C1 OS                    | -0.676972          | 0.2075997    | 0.0018804 | 0.0043093 | -0.288562    | 0.3073412 | 0.1037186 | 0.2847178    | -0.798538      | 0.0808886 | 0.0034028                      | 0.1077567 | TRUE | TRUE  |
| Q05707     | COL14A1  | Collagen alpha-1(XIV) chain OS                                      | -0.557277          | 0.0123888    | 0.0001647 | 0.0015097 | 0.5747125    | 0.2726671 | 0.0675206 | 0.2250688    | 0.3576059      |           |                                |           | TRUE | TRUE  |
| P30101     | PDI3A    | Protein disulfide-isomerase A3 OS                                   | -0.299934          | 0.2381446    | 0.0517631 | 0.0169995 | 0.2678003    | 0.3022794 | 0.057531  | 0.2237316    | -0.039505      | 0.2865636 | 0.8006693                      | 0.6338632 | TRUE | TRUE  |
| Q13724     | MOGS     | Mannosyl-oligosaccharide glucosidase OS                             | -0.46823           | 0.2083968    | 0.194106  | 0.0751151 | -0.447137    | 0.0548484 | 0.0550812 | 0.236777     | -0.415095      |           |                                |           | TRUE | TRUE  |
| Q71U36     | TUBA1A   | Tubulin alpha-1A chain OS                                           | -0.003483          | 0.2882285    | 0.9775341 | 0.2937944 | 0.32613      | 0.3681215 | 0.082135  | 0.2555312    | 0.481697       | 0.3660861 | 0.1502996                      | 0.3172991 | TRUE | FALSE |
| Q8NBJ5     | GLT25D1  | Proteoglycan galactosyltransferase 1 OS                             | -0.753672          | 0.2218248    | 0.000106  | 0.0019431 | -0.201574    | 0.2893205 | 0.1148461 | 0.2820783    | -0.617783      | 0.2575846 | 0.01724                        | 0.0909889 | TRUE | TRUE  |
| Q14697     | GANAB    | Neutral alpha-glucosidase AB OS                                     | -0.742162          | 0.2410047    | 0.0001838 | 0.0011234 | -0.193875    | 0.2802377 | 0.1169239 | 0.2728224    | -0.593316      | 0.2641877 | 0.0205933                      | 0.0931601 | TRUE | TRUE  |
| Q15084     | PDI6A    | Protein disulfide-isomerase A6 OS                                   | -0.448138          | 0.2531954    | 0.0033861 | 0.0068976 | 0.3911737    | 0.3946671 | 0.0394627 | 0.1841594    | 0.068972       | 0.1604777 | 0.4532244                      | 0.4784035 | TRUE | TRUE  |
| P30040     | ERP29    | Endoplasmic reticulum resident protein 29 OS                        | -0.794315          | 0.2476164    | 0.0076737 | 0.0108219 | -0.514402    | 0.2393216 | 0.023157  | 0.15438      | -0.826351      | 0.0925908 | 0.0503341                      | 0.1593913 | TRUE | TRUE  |
| Q92896     | GLG1     | Golgi apparatus protein 1 OS                                        | 0.2050994          | 0.0588388    | 0.1274122 | 0.0556164 | -0.114662    | 0.0410513 | 0.1578493 | 0.3507763    | -0.531325      | 0.246929  | 0.2021296                      | 0.3555983 | TRUE | TRUE  |
| Q43493     | TGOLN2   | Trans-Golgi network integral membrane protein OS                    | -0.236461          | 0.1884358    | 0.3266778 | 0.1247728 | -0.510737    | 0.0442289 | 0.0389343 | 0.2018814    | -0.344227      |           |                                |           | TRUE | TRUE  |
| P34931     | HSPA1L   | Heat shock 70 kDa protein 1-like OS                                 | 0.0539744          | 0.3227324    | 0.7600343 | 0.2361688 | 0.4693401    | 0.5418938 | 0.1816587 | 0.3853366    | 0.4068648      | 0.9043029 | 0.4345231                      | 0.4744793 | TRUE | FALSE |
| Q9BS26     | ERP44    | Endoplasmic reticulum resident protein 44 OS                        | -0.075511          | 0.2106157    | 0.4200261 | 0.1509898 | 0.2758737    | 0.2358535 | 0.0351947 | 0.2053026    | 0.1766761      | 0.2318082 | 0.3176331                      | 0.3868609 | TRUE | TRUE  |
| Q969V3     | NCLN     | Nicalin OS                                                          | -0.545481          | 0.0819438    | 0.0673714 | 0.0374286 | -0.245894    | 0.1514497 | 0.2330805 | 0.4532122    | -0.523398      |           |                                |           | TRUE | TRUE  |
| P55145     | MANF     | Mesencephalic astrocyte-derived neurotrophic factor OS              | 0.1806661          | 0.066202     | 0.1614032 | 0.0657568 | 0.3749943    | 0.1978205 | 0.2272944 | 0.4611771    | 0.1702561      | 0.0902814 | 0.228376                       | 0.3615953 | TRUE | TRUE  |
| Q14737     | PDCD5    | Programmed cell death protein 5 OS                                  | -0.202758          | 0.586477     | 0.7104985 | 0.0256229 | 0.1650754    | 0.1011953 | 0.2603942 | 0.4860692    | 0.1049966      | 0.0617322 | 0.2508288                      | 0.3610415 | TRUE | FALSE |
| P13674     | HAHA1    | Prolyl 4-hydroxylase subunit alpha-1 OS                             | -0.642668          | 0.1736381    | 0.0234794 | 0.0195661 | -0.330993    | 0.3716614 | 0.2629011 | 0.4718738    | -0.476562      |           |                                |           | TRUE | TRUE  |
| Q94905     | ERLIN1   | Erlin-1 OS                                                          | -0.498335          | 0.1396726    | 0.0056659 | 0.0103875 | -0.245894    | 0.4174238 | 0.3236813 | 0.5035042    | -0.915116      |           |                                |           | TRUE | TRUE  |
| P57976     | CPD      | Carboxypeptidase D OS                                               | -0.152682          | 0.1649275    | 0.0726545 | 0.0391765 | -0.082315    | 0.1837276 | 0.3224685 | 0.5189148    | -0.331232      | 0.1801077 | 0.0860279                      | 0.2095552 | TRUE | FALSE |
| P39656     | DOST2    | Dolichyl-diphosphooligosaccharide--protein glycosyltransferase 2 OS | -0.576607          | 0.3448842    | 0.0442632 | 0.0270497 | -0.236186    | 0.3605243 | 0.2814066 | 0.4863818    | -0.028398      | 0.0625654 | 0.9061892                      | 0.6521816 | TRUE | FALSE |
| P53396     | ACLY     | ATP-citrate lyase OS                                                | 0.0988213          | 0.043924     | 0.0204948 | 0.0187869 | 0.3046931    | 0.4967037 | 0.3073776 | 0.5122959    | 0.2171114      | 0.4415964 | 0.6132124                      | 0.5548113 | TRUE | FALSE |
| Q96AY3     | FKBP10   | Peptidyl-prolyl cis-trans isomerase FKBP10 OS                       | -0.565879          | 0.1558876    | 0.1224751 | 0.0561344 | -0.536525    | 0.4800673 | 0.3591277 | 0.5237278    | -0.894934      |           |                                |           | TRUE | TRUE  |
| Q8NBJ7     | GOLM1    | Golgi membrane protein 1 OS                                         | -0.101227          | 0.306984     | 0.72221   | 0.2282848 | -0.153611    | 0.1370854 | 0.3583712 | 0.5394835    |                |           |                                |           | TRUE | TRUE  |
| P46977     | STT3A    | Dolichyl-diphosphooligosaccharide--protein glycosyltransferase 3 OS | -0.354025          | 0.676391     | 0.3720973 | 0.1364357 | -0.236726    | 0.4592397 | 0.3784033 | 0.5351158    | 0.440611       | 0.1856924 | 0.1843815                      | 0.3434557 | TRUE | TRUE  |
| Q8WVK2     | SNRNP27  | U4/U6.U5 small nuclear ribonucleoprotein 27 OS                      | 0.3377782          | 0.1252063    | 0.0428761 | 0.0271056 | -0.158499    | 0.2769899 | 0.4260979 | 0.5681305    | 0.2379211      | 0.7507738 | 0.6381739                      | 0.5613567 | TRUE | FALSE |
| Q94905     | ERLIN2   | Erlin-2 OS                                                          | -0.648072          | 0.0931228    | 0.0068122 | 0.0104076 | -0.302518    | 0.5251485 | 0.4235096 | 0.5812876    | -0.257147      | 0.5204965 | 0.6117635                      | 0.5697797 | TRUE | TRUE  |
| P27824     | CANX     | Calnexin OS                                                         | -0.306138          | 0.2758668    | 0.0260804 | 0.0199225 | 0.0713011    | 0.2607304 | 0.4965414 | 0.6436648    | -0.250075      | 0.2475338 | 0.1369505                      | 0.3089548 | TRUE | TRUE  |
| Q07065     | CKAP4    | Cytoskeleton-associated protein 4 OS                                | -0.278041          | 0.3036189    | 0.1099781 | 0.0544936 | -0.087154    | 0.26444   | 0.5020336 | 0.6331955    | -0.299279      | 0.1537663 | 0.2218472                      | 0.3697454 | TRUE | TRUE  |
| P13162     | PRDX4    | Peroxisiredoxin-4 OS                                                | -0.19441           | 0.5008915    | 0.0505744 | 0.0299096 | -0.19181     | 0.6100552 | 0.520788  | 0.607586     | -0.270437      | 0.7650221 | 0.6026885                      | 0.5783374 | TRUE | FALSE |
| P04844     | RPND4    | Dolichyl-diphosphooligosaccharide--protein glycosyltransferase 4 OS | -0.509792          | 0.2265955    | 0.1938657 | 0.0772653 | -0.149155    | 0.2227772 | 0.5173742 | 0.6190803    | -0.279244      | 0.1068062 | 0.1681552                      | 0.3328071 | TRUE | TRUE  |
| O60568     | PLOD3    | Procollagen-lysine-2-oxoglutarate 5-dioxygenase OS                  | -0.52997           | 0.304802     | 0.017729  | 0.0171069 | -0.087259    | 0.2748142 | 0.1569077 | 0.6347989    | -0.620588      | 0.0125658 | 0.0091114                      | 0.0962065 | TRUE | TRUE  |
| O43853     | CALU     | Calumenin OS                                                        | -0.166898          | 0.1684386    | 0.0910546 | 0.0463704 | -0.094188    | 0.3189333 | 0.5451128 | 0.6204536    | 0.0510878      | 0.720803  | 0.9364014                      | 0.6589491 | TRUE | TRUE  |
| Q96H7E     | ERO1L    | ERO1-like protein alpha OS                                          | -0.431444          | 0.2691141    | 0.0230672 | 0.020138  | -0.06635     | 0.2848699 | 0.583172  | 0.6479689    | -0.365525      | 0.2642975 | 0.3008877                      | 0.3811244 | TRUE | TRUE  |
| P04843     | RPN1     | Dolichyl-diphosphooligosaccharide--protein glycosyltransferase 1 OS | -0.25574           | 0.3294794    | 0.0858109 | 0.0449486 | 0.0727363    | 0.3462345 | 0.5984363 | 0.6494657    | -0.247844      | 0.36298   | 0.2654388                      | 0.3654592 | TRUE | TRUE  |
| P49257     | LMAN1    | Protein ERGIC-53 OS                                                 | -0.150026          | 0.2309473    | 0.1364683 | 0.0581842 | -0.048891    | 0.278008  | 0.6575535 | 0.6974052    | -0.110647      | 0.2339442 | 0.413972                       | 0.4681827 | TRUE | TRUE  |
| Q08380     | LGALS3BP | Galectin-3-binding protein OS                                       | -0.370781          | 0.2433778    | 0.0135465 | 0.0155221 | -0.096558    | 0.5368334 | 0.6779148 | 0.7030227    | -0.218676      | 0.4632811 | 0.4995133                      | 0.49431   | TRUE | FALSE |
| Q8NBS9     | TXNDC5   | Thioredoxin domain-containing protein 5 OS                          | -0.11925           | 0.1666708    | 0.1400597 | 0.0583582 | 0.0594168    | 0.3870207 | 0.7223043 | 0.6879089    | 0.0901041      | 0.5798955 | 0.813045                       | 0.6279616 | TRUE | TRUE  |
| P68371     | TUBB2C   | Tubulin beta-2C chain OS                                            | -0.10774           | 0.2510816    | 0.5347906 | 0.1849905 | 0.0655654    | 0.2672895 | 0.7122773 | 0.7228002    | 0.0608299      |           |                                |           | TRUE | FALSE |
| P02786     | TFRC     | Transferrin receptor protein 1 OS                                   | -0.051532          | 0.2855306    | 0.7071781 | 0.2315186 | 0.0648822    | 0.3801527 | 0.7221367 | 0.7020773    | 0.0548422      | 0.3622192 | 0.8176743                      | 0.6165004 | TRUE | FALSE |
| P23284     | PF1B     | Peptidyl-prolyl cis-trans isomerase B OS                            | -0.435472          | 0.1137261    | 0.0002322 | 0.0010644 | 0.0449634    | 0.2866445 | 0.7166006 | 0.7115237    | -0.277035      | 0.1843749 | 0.057434                       | 0.151562  | TRUE | TRUE  |
| Q9P035     | PTPLAD1  | 3-hydroxyacyl-CoA dehydratase 3 OS                                  | -0.677797          | 0.2378474    | 0.0386806 | 0.0262646 | 0.1195915    | 0.5338488 | 0.7354134 | 0.6863859    | 0.2132603      |           |                                |           | TRUE | TRUE  |
| P50454     | SERPINH1 | Serpin H1 OS                                                        | -0.607615          | 0.2403058    | 0.0016009 | 0.0041928 | -0.03693     | 0.3074625 | 0.78042   | 0.7141098    | -0.268208      | 0.3116714 | 0.2745702                      | 0.3622802 | TRUE | TRUE  |
| Q16706     | MAN2A1   | Alpha-mannosidase 2 OS                                              | -0.014725          | 0.3966609    | 0.9666081 | 0.2953525 | 0.0249355    | 0.1078348 | 0.7987916 | 0.7168643    | -0.576281      |           |                                |           | TRUE | TRUE  |
| P14314     | PRKCSH   | Glucosylase 2 subunit beta OS                                       | -0.533779          | 0.2271609    | 0.0007999 | 0.0024441 | 0.0204245    | 0.2698741 | 0.8478001 | 0.7326668    | -0.229513      | 0.4532787 | 0.3857931                      | 0.4524734 | TRUE | TRUE  |
| Q14204     | DYNLC1H1 | Cytosolic dynein 1 heavy chain 1 OS                                 | -0.089881          | 0.1033445    | 0.4377161 | 0.154323  | 0.0202204    | 0.1164393 | 0.8466884 | 0.7455118    |                |           |                                |           | TRUE | FALSE |
| Q13217     | DNAJC3   | Dnaj homolog subfamily C member 3 OS                                | -0.159162          | 0.102165     | 0.1142752 | 0.0551328 | 0.0293891    | 0.2737593 | 0.8696408 | 0.737877     | 0.0193887      |           |                                |           | TRUE | TRUE  |
| Q9NVU2     | UGT1T1   | UDP-glucosyltransferase 1 OS                                        | -0.303694          | 0.2351689    | 0.0250032 | 0.0199301 | 0.0191161    | 0.2875121 | 0.8770052 | 0.7308377    | -0.358412      | 0.1238417 | 0.0375683                      | 0.1321848 | TRUE | TRUE  |
| Q9H3N1     | TMX1     | Thioredoxin-related transmembrane protein 1 OS                      | -0.463617          | 0.3047219    | 0.1188667 | 0.0558775 | 0.0195013    | 0.2737573 | 0.9130846 | 0.7475546    | -0.120576      | 0.4038269 | 0.7456401                      | 0.6213667 | TRUE | TRUE  |
| Q9Y2B0     | CNPY2    | Protein domain homolog 2 OS                                         | -0.510078          | 0.1416489    | 0.1234385 | 0.0551961 | -0.075046    | 0.822410  |           |              |                |           |                                |           |      |       |
